1 Title: **Abiotic treatment to common bean plants results in an altered seed microbiome**

2

3 Authors: A. Fina Bintarti<sup>1,2</sup>, Patrick J. Kearns<sup>2\*</sup>, Abby Sulesky<sup>2,3</sup>, and Ashley Shade<sup>1,2,3</sup>

4 1. Department of Plant, Soil and Microbial Sciences, Michigan State University, East Lansing MI  
5 48824

6 2. The Plant Resilience Institute, Michigan State University, East Lansing MI 48824

7 3. Department of Microbiology and Molecular Genetics, Michigan State University, East Lansing MI  
8 48824

9 \*current affiliation: Department of Natural and Applied Sciences, Bentley University, Waltham, MA  
10 02452

11

## 12 **Abstract**

13 We performed a pilot study in a controlled growth chamber to investigate how the seed microbiome of  
14 the common bean (*Phaseolus vulgaris* L. (var. Redhawk)) was altered under abiotic treatments relevant  
15 for crop management with changing climate. Bean plants were subjected to one of three treatments:  
16 66% water withholding to simulate mild drought, 50 % Hoagland nutrient solution to simulate  
17 fertilization, or control with sufficient water and baseline nutrition. We performed 16S rRNA gene  
18 amplicon sequencing and ITS amplicon sequencing of the endophytic metagenomic DNA to assess seed  
19 bacterial/archaeal and fungal community structure, respectively. We found that variability in the seed  
20 microbiome structure was high while alpha diversity was low, with tens of taxa present. Water  
21 withholding and nutrient addition altered the seed microbiome structure for bacterial/archaeal  
22 communities as compared to the untreated control, and each treatment resulted in a distinct  
23 microbiome structure. There were no statistically supported differences in the fungal microbiome across  
24 treatments. While we discuss several limitations of this study, the promising results suggest that further  
25 and more comprehensive investigation is needed to better understand abiotic stress-induced changes in

26 the seed microbiome, the mechanisms that drive those changes, and the implications of seed  
27 microbiome changes for the health and stress responses of the next plant generation.

28

29 **Key words**

30 plant microbiome, 16S rRNA gene, ITS, drought, fertilizer, legume, growth chamber, endophyte, vertical  
31 transmission, abiotic stress

32

33 **Introduction**

34 The plant microbiome includes bacteria, archaea, fungi, and viruses that associate with the plant  
35 and inhabit different plant compartments, including the rhizosphere, phyllosphere, and endosphere  
36 (Compant et al., 2019). The plant microbiome plays important roles for plant fitness, including nutrient  
37 acquisition (Herrera Paredes et al., 2018), secondary metabolite production (Gargallo-Garriga et al.,  
38 2016), flowering time (Panke-Buisse et al., 2015), and resistance to abiotic (Lau & Lennon, 2012; Naylor  
39 & Coleman-Derr, 2018) and biotic stresses (Mendes et al., 2011; Ritpitakphong et al., 2016). Plant  
40 microbiota can interact with each other as well as with the host plant, and the plant is able to shape its  
41 microbiome structure and composition, for example, by producing root exudates or allelochemicals  
42 (Jones et al., 2019; Sasse et al., 2018). Because plants are also influenced by the environment, any  
43 stresses that a plant experiences are likely to also affect the plant microbiome. These environmental  
44 stresses include abiotic stressors, such as changes in water and nutrient availability (limitation or excess)  
45 and exposure to high temperatures, and biotic stressors, such as pathogen infection and herbivory.  
46 Regardless of the type of stressor, as the plant responds it may alter its microbiome, either as a direct or  
47 indirect consequence of the stress. Thus, both the environmental conditions and the host plant can act  
48 as important filters that contribute to the ultimate composition of the plant microbiome (Hacquard et  
49 al., 2017; Vacher et al., 2016).

50 Managing or manipulating the plant microbiome is one promising strategy to support plant  
51 tolerance to environmental stress. We are just beginning to understand how exactly the plant  
52 microbiome structure is altered during particular stressors (e.g., drought (Xu et al., 2018), with a focus  
53 on the root zone and rhizosphere microbiome. We conducted a controlled study in an environmental  
54 growth chamber to characterize changes in the rhizosphere microbiome of the legume common bean  
55 under two different stressors of water withholding and nutrient excess. The initial purpose of our pilot  
56 study was to identify members of the root microbiome that were particularly resilient either to these  
57 stressors. However, the plants set pods at the end of the experiment, and we realized the opportunity to  
58 also assess the seed microbiome of the treated plants as compared to control plants. The purpose of  
59 this brief report is to share the seed microbiome results from the pilot study, to discuss its limitations,  
60 and to suggest immediate future directions based on the most promising results.

61

## 62 **Methods**

63 ***Plant growth conditions and harvest.*** Common bean seeds were surface-sterilized in a 10% bleach  
64 solution and planted in 24 one-gallon pots filled with a mixture of agricultural topsoil, sphagnum peat  
65 and sand that had been steam-sterilized at ~100°C. The plants were grown in controlled conditions  
66 in a BioChambers FLEX™ LED growth chamber with a 16-hour day/8-hour night cycle at 29°C and 22°C,  
67 respectively. The plants were divided into three groups: 8 control plants received ample water (300 mL  
68 every other day), 8 plants were subjected to a mild “drought” during plant development, and received  
69 66% less water (100 mL every other day) (water withholding), and 8 plants received half strength  
70 Hoagland solution (300 mL every other day) provided by the growth chamber facility (nutrient addition).  
71 The plants were grown until the R8 stage, when plants were fully developed, and the seed pods began  
72 drying.

73 Harvesting was conducted by collecting the bean pods and plant biomass. Bean seeds were  
74 removed from the pods and the remaining above ground biomass from each plant was placed in a  
75 brown paper bag and dried at 70°C for one week. The root system was gently pulled from the pot,  
76 cleaned of excess soil with deionized water and dried at 70°C for one week. Once dried, the above and  
77 below ground dry weight was measured for each plant. The remaining soil was collected for soil  
78 chemical analysis. One hundred grams of each soil sample was sent to the Michigan State University Soil  
79 and Plant Nutrient Laboratory (SPNL) for soil chemical testing. Soil parameters including pH, lime index,  
80 phosphorus (P), potassium (K), calcium (Ca), magnesium (Mg), nitrate (NO<sub>3</sub><sup>-</sup>), ammonium (NH<sub>4</sub><sup>+</sup>), and  
81 organic matter (OM) were measured from all soil samples.

82  
83 ***DNA extraction and amplicon sequencing.*** Twenty seeds from each plant were collected for DNA  
84 extraction following the protocol of the previous study (Barret et al., 2015). Seeds were surfaced  
85 sterilized in 10% bleach and placed in sterile 50 mL centrifuge tubes with 30 mL of sterile 1X PBS with  
86 0.05% Tween 20 and shaken at 140 rpm at room temperature for 4 hours. After shaking, tubes were  
87 centrifuged at 500 x g for 15 minutes and the supernatant and seeds were discarded. The pellet was  
88 resuspended with 2 mL of sterile 1X PBS-Tween and transferred to a microcentrifuge tube and spun at  
89 20,000 x g for 10 min. The supernatant was discarded, and the pellet was used for DNA extraction with  
90 the PowerSoil<sup>®</sup> DNA Isolation Kit (MoBio Laboratories, Solana Beach, CA, United States) following  
91 manufacturer's instructions. DNA extracted from seeds were quantified with Qubit<sup>™</sup> dsDNA BR Assay Kit  
92 (ThermoFisher Scientific, Waltham, MA, United States) and verified with Polymerase Chain Reaction  
93 (PCR) using 515f/806r universal primers (Caporaso et al., 2011) for amplification of the V4 region of the  
94 16S rRNA gene for bacterial/archaeal community analysis. The 16S rRNA gene amplification was  
95 conducted under the following conditions: 95°C for 5 min, followed by 30 cycles of 95°C (30 s), 54°C (45  
96 s), and 72°C (90 s), with a final extension at 72°C (5 min). The amplification was performed in 12.5 µl

97 mixtures containing 6.25  $\mu$ l GoTaq<sup>®</sup>Green Master Mix (Promega, Madison, WI, United States), 0.125  $\mu$ l  
98 of each primer (20 mM), 1  $\mu$ l of DNA template (final concentration of 0.02 - 0.626 ng per  $\mu$ l), and 4.5  $\mu$ l  
99 nuclease free water. Seed DNA (concentration range of 5 - 20 ng per  $\mu$ l) was sequenced at the Research  
100 Technology Support Facility (RTSF) Genomics Core, Michigan State sequencing facility using Illumina  
101 MiSeq platform.

102 Fungal communities were assessed using PCR amplification of the Internal Transcribed Spacer 1  
103 (ITS1) region with the ITS1f/ITS2 primer pair (Walters et al., 2015) with the addition of index adapters as  
104 required by the RTSF Genomics Core, ([https://rtsf.natsci.msu.edu/genomics/sample-  
105 requirements/illumina-sequencing-sample-requirements/](https://rtsf.natsci.msu.edu/genomics/sample-requirements/illumina-sequencing-sample-requirements/)). The PCR conditions of ITS gene amplification  
106 were as follows: 95°C for 5 min, followed by 30 cycles of 95°C (30 s), 54°C (45 s), and 72°C (90 s), with a  
107 final extension at 72°C (5 min). The amplification was performed in 50  $\mu$ l mixtures containing 20  $\mu$ l  
108 GoTaq<sup>®</sup>Green Master Mix (Promega, Madison, WI, United States), 1  $\mu$ l of each primer (20 mM), 4  $\mu$ l of  
109 DNA template (final concentration of 0.02 – 0.626 ng per  $\mu$ l), and 26  $\mu$ l nuclease free water. The product  
110 of the ITS gene amplification was cleaned and purified using the Wizard<sup>®</sup>SV Gel and PCR Clean-Up  
111 System (Promega, Madison, WI, United States), following the manufacturer’s protocol. Purified ITS gene  
112 amplification products with the concentration range of 5 - 50 ng per  $\mu$ l were sequenced at the RTSF  
113 Genomics Core using the Illumina MiSeq platform. The 16S and ITS libraries were prepared using the  
114 Illumina TruSeq<sup>®</sup> Nano DNA Library Prep Kit. Illumina MiSeq was run using v2 Standard and paired end  
115 reads sequencing format (2 x 250 bp).

116

117 **Sequencing data analysis and OTU clustering.** Bacterial/archaeal raw reads produced from Illumina  
118 MiSeq were processed including merging the paired end reads, filtering the low-quality sequences,  
119 dereplication to find unique sequence, singleton removal, denoising, and chimera checking using the  
120 USEARCH pipeline (v.10.0.240) (Edgar & Flyvbjerg, 2015). Operational taxonomic unit (OTU) clustering

121 was conducted using an open reference strategy (Lee et al., 2017). First, closed reference OTU picking  
122 was performed at 97 % identity by clustering quality filtered reads against the SILVA database (v.132)  
123 (Quast et al., 2013) using USEARCH algorithm (*-usearch\_global* command) (Edgar, 2010). Reads that  
124 failed to match the SILVA reference were subsequently clustered *de novo* at 97% identity using UPARSE-  
125 OTU algorithm (*-cluster\_otus* command) (Edgar, 2013). Closed reference and *de novo* OTUs were  
126 combined into a full set of representative sequences, and then all merged sequences were mapped back  
127 to that set using the *-usearch\_global* command.

128 The set of representative sequences were aligned on QIIME 1.9.1 (Caporaso et al., 2010b) using  
129 PyNAST (Caporaso et al., 2010a) against the SILVA (v.132) reference database. The unaligned OTU  
130 sequences were excluded from the OTU table and the representative sequences. Taxonomic assignment  
131 was conducted on QIIME 1.9.1 using the SILVA (v.132) database and the UCLUST default classifier at a  
132 minimum confidence of 0.9 (Edgar, 2010). Plant contaminants such as chloroplast and mitochondria;  
133 and unassigned taxa and sequences were removed from the OTU table as well as the representative  
134 sequences using *filter\_taxa\_from\_otu\_table.py* and *filter\_fasta.py* command on QIIME. Rarefaction to  
135 the lowest sequencing depth (Gihring et al., 2012; Weiss et al., 2017) (11,137 bacterial/archaeal reads)  
136 was conducted on QIIME.

137 The processing of fungal ITS raw reads was also conducted using the USEARCH (v.10.0.240)  
138 pipeline. Read processing included paired end read merging, primer removal using cutadapt (v.2.0)  
139 (Martin, 2011), filtering the low-quality sequences, and dereplication to find unique sequence.  
140 Operational taxonomic unit clustering was conducted using an open reference OTU picking strategy.  
141 First, closed reference OTU picking was performed by clustering quality filtered reads against the UNITE  
142 fungal ITS database (v.8.0) (Kõljalg et al., 2013) at 97% identity threshold using the USEARCH algorithm.  
143 Reads that failed to match the reference were clustered *de novo* at 97% identity using the UPARSE-OTU  
144 algorithm. Closed reference and *de novo* OTUs were combined into a full set of representative

145 sequences, and then all merged sequences were mapped back to that set using *-usearch\_global*  
146 command. Fungal taxonomic classification was performed in CONSTAX tool (Gdanetz et al., 2017) at a  
147 minimum confidence of 0.8 using the UNITE reference database release 01-12-2017. Assigning  
148 taxonomy in CONSTAX was conducted using three classifiers, including RDP Classifier (v.11.5) (Cole et al.,  
149 2014; Wang et al., 2007), UTX from USEARCH (v.8.1.1831) (Edgar, 2013), and SINTAX from USEARCH  
150 (v.9.2) (Edgar, 2016). Any contaminants including mitochondria, chloroplast and other unwanted  
151 lineages of eukaryotes were removed from the OTU table. Rarefaction was conducted to the lowest  
152 number of sequences (21,329 fungal reads) on QIIME.

153

154 **Microbial community analysis.** Microbial community analyses were conducted in R (v.3.6.1) (R Core  
155 Development Team). Microbial composition and relative abundance were analyzed using Phyloseq  
156 package (v.1.28.0) on R (McMurdie & Holmes, 2013). Microbial richness (the number of taxa present)  
157 was calculated on the rarefied OTU table using the vegan package (v.2.5-6) (Oksanen et al., 2019). The  
158 normality and homoscedasticity of the data were tested using Saphiro-Wilk and Levene's test,  
159 respectively. The one-way analysis of variance (one-way ANOVA) or non-parametric Kruskal-Wallis test  
160 was then performed to analyze the data. Post hoc Dunn's test with false discovery rate (FDR) correction  
161 using the Benjamini-Hochberg adjustment for multiple comparisons was performed to compare plant  
162 biomass data among treatments.

163 Beta diversity was calculated on the rarefied OTU table using the vegan package using Jaccard  
164 dissimilarity indices and visualized with a principal coordinate analysis (PCoA) plot. We used the Jaccard  
165 index, which is based on presence-absence counts rather than relative abundance data, because we  
166 reasoned that the seed microbiome members are unlikely to be actively growing inside the seed and  
167 that any differences in relative abundances in the seed endophyte are unlikely attributable to  
168 competitive growth outcomes *in situ*. Permutational multivariate analysis of variance (PERMANOVA)

169 using the function `adonis` (Oksanen et al., 2019) was performed to assess the effects of the treatments  
170 to the microbial community structure. We performed multivariate analysis to check the homogeneity of  
171 dispersion (variance) among groups using the function `betadisper` (Oksanen et al., 2019).

172

173 **Data and code availability.** The computational workflows for sequence processing and ecological  
174 statistics are available on GitHub ([https://github.com/ShadeLab/BioRxiv\\_Seed\\_Microbiome\\_2020](https://github.com/ShadeLab/BioRxiv_Seed_Microbiome_2020)). Raw  
175 sequence data of bacteria/archaea and fungi have been deposited in the Sequence Read Archive (SRA)  
176 NCBI database under Bioproject accession number PRJNA635871.

177

## 178 **Results**

179         There were overall differences in plant biomass among treatments (Kruskal-Wallis results Table  
180 1). Specifically, plants receiving nutrient-addition were larger in shoot and root biomass than control or  
181 mildly droughted plants (Fig. 1, Table 1). Nutrient-addition plants also had higher pod number and pod  
182 mass compared to the water withholding and control plants (Fig. 1, Table 1). Rhizosphere soil from the  
183 nutrient addition treatment had higher phosphorus and potassium content than the other two  
184 treatments (Fig. 2, Table 2). Nutrient addition plants also had rhizosphere soils with higher nitrate  
185 relative to control plants (Fig. 2, Table 2).

186         Analysis of bacterial/archaeal and fungal sequences from seed samples resulted in a total of 81  
187 and 226 OTUs (97% sequence identity), respectively. Bacterial/archaeal communities in control, water  
188 withholding, and nutrient addition seeds had different taxonomic compositions (Fig. 3A).

189 Bacterial/archaeal communities in the control seeds were almost exclusively dominated by the OTUs  
190 within the genus *Bacillus*, with a mean relative genus-level abundance of more than 99%. Although the  
191 bacterial/archaeal community in the water withholding and nutrient addition seeds were also  
192 dominated by *Bacillus*, genus-level taxonomic diversity increased with the addition of other, non-



193 dominating lineages. Specifically, water with-holding and nutrient addition seed communities were also  
194 composed of *Virgibacillus*, *Pseudomonas*, and several other bacterial/archaeal genera.

195 Similarly, different plant treatments had different seed fungal community compositions. Even  
196 though *Aspergillus* dominated the fungal community in the control and treated seeds, in the treated  
197 seeds there was a shift to include other fungal taxa, including some identified as *Penicillium* and  
198 *Wallemia* (Fig. 3B). These observations indicate that the seed microbiome is altered when maternal  
199 plants are exposed to abiotic stress or environmental alternation. Since the seed microbiomes contained  
200 a relatively simple community of tens to dozens of taxa, even alterations in the composition or  
201 abundances of few taxa may have consequence for microbiome assembly of the next plant generation.

202 Because we do not expect microbiome members to be actively doubling inside the seed, we  
203 used a presence-absence assessment (Jaccard index) of beta diversity. There was a statistically  
204 supported difference in bacterial/archaeal microbiome composition between treated seeds and control  
205 seeds (Fig. 4A, permuted multivariate analysis of variance, PERMANOVA, F-stat = 4.73,  $R^2 = 0.31$ , P-val =  
206 0.001). In contrast, there was no distinct clustering of fungal communities associated with different  
207 treatments (Fig. 4B, PERMANOVA P-val > 0.05). These results indicate that abiotic treatments alter the  
208 bacterial/archaeal but not fungal community composition in the common bean seed. Also, there were  
209 differences variability in composition (multivariate dispersion) among treatments for bacterial/archaeal  
210 communities (permuted analysis of multivariate dispersion, PERMDISP, F=7.553, P-val=0.0033), but  
211 not for fungal composition (PERMDISP F=0.491, P-val=0.619). This provide additional evidence that  
212 abiotic treatments can lead to increased variability in seed microbiome composition. Notably,  
213 PERMANOVA was found to be largely unaffected by heterogeneity for balanced designs (Anderson &  
214 Walsh, 2013).

215

216 **Discussion**

217           Seed microbiomes are an endpoint of microbiome assembly for the maternal plant's  
218 reproductive compartment, but also the starting point of microbiome assembly for the new seedling  
219 (Shade et al., 2017). Seed microbiomes are composed of early colonizers that are acquired from the  
220 maternal plant either through the vascular system or floral stigma, and also of late colonizers that are  
221 acquired via seed contact with its environment (Maude, 1996). Moreover, the seed microbiome also can  
222 directly impact the seed and seedling in ways that are important for crop establishment, such as by  
223 releasing the seed from dormancy and promoting seed germination and seedling emergence (Goggin et  
224 al., 2015; Lamichhane et al., 2018). While the vast majority of plant-associated microorganisms are  
225 acquired from the surrounding environment, (e.g., aerosols (Vacher et al., 2016) and soils (Edwards et  
226 al., 2015)), vertical transmission of microbes via the seed has been reported for a variety of plant  
227 species, as recently summarized (Shade et al., 2017) and reported (Bergna et al., 2018; Rodríguez et al.,  
228 2020). For the majority of seed microbiome members, their identities, functions and persistence are  
229 either not known or not well-understood. However, it is plausible that some of members of the seed  
230 microbiome that are altered as a result of stress may have consequence for the health or resilience of  
231 the next plant generation. Specifically, a depletion of beneficial members or enrichment of pathogens  
232 could disadvantage the plant, while an enrichment of beneficial members could advantage the plant.

233           We highlight three important observations from this study. First, treatment of the parent plant  
234 altered the seed microbiome structure and composition compared to control plants, especially for the  
235 bacterial/archaeal community. Second, bacterial/archaeal community from the seeds of treated plants  
236 had more variation as compared to the seeds from control plants. This suggests that abiotic stress  
237 results in changes analogous to those observed during other types of microbiome “dysbiosis” (aka Anna  
238 Karenina effects: higher variability across replicates, increased beta-dispersion, and higher contribution  
239 of stochastic assembly processes (Zaneveld et al., 2017)). The expectation of high variability should be  
240 taken into consideration for future studies, as sufficient replication will be needed to power statistical

241 tests. Third and finally, the fungal community was, on balance, stable relative to the bacterial/archaeal  
242 community, suggesting that the persistence of fungal members is less sensitive to water-withholding  
243 and nutrient addition.

244           We acknowledge that this is a pilot study and that these results are preliminary. We offer a  
245 discussion of some of the major considerations and limitations in interpreting the results and for  
246 planning future seed microbiome studies.

247           A first consideration is that there is an apparent maximum stress to plants that can be applied  
248 when investigating its consequence for a seed microbiome. After stress exposure is released, plants  
249 must be healthy enough to produce pods and seeds, and a balance must be achieved in which plants are  
250 stressed but still able to become fully mature. This constraint in stress exposure will never  
251 accommodate an experimental design of severe or prolonged stress. However, the investigation of a  
252 mild or moderate stress is still valuable because it is pertinent to agriculture. There many situations in  
253 which non-lethal stress occurs over part of a growing season, but then crops recover fully or partially to  
254 produce some yield. Therefore, the result of mild or moderate stress for seed microbiomes has real-  
255 world relevance.

256           Another consideration is the definition and directness of abiotic treatment, and whether an  
257 abiotic treatment is expected to act on the plant, the microbiome, or both. In this pilot study, we applied  
258 two different abiotic treatments: one that was expected to stress the plant directly (water-withholding  
259 to simulate mild drought) and one that was expected to weaken a legume's relationship with its root-  
260 associated microbiome and symbiotic nitrogen fixers as nitrogen fixers are down-regulated by nitrogen  
261 application (Müller & Pereira, 1995; Wilker et al., 2019) (nutrient addition). Thus, the addition of  
262 nutrients was a benefit to the plant, rather than a stress, as indicated by the increased root and shoot  
263 masses. However, nutrient addition caused a clear shift in the seed microbiome, demonstrating the  
264 potential of fertilizer use to have multi-generational for plant microbiome assembly. Therefore,

265 management practices that advantage the plant as far as yield and health in the short term could have  
266 long-term consequences for plant-microbiome relationships.

267 A clear limitation of the study is the substrate used for plant growth, which, with the microbes in  
268 and on the original seeds, serves as a starting source for the assembly of the new plant's microbiome  
269 (Barret et al., 2015; Shade et al., 2017). For the pilot, used agricultural topsoil mixed with sphagnum  
270 peat and sand and sterilized, and this mix is provided by the growth chamber facility. The exact origin  
271 and physical/chemical characteristics of facility topsoil us unknown, and so it is unclear how  
272 representative this soil may be of bean field soil. Additionally, the initial microbial community in the soil  
273 was not analyzed before planting the common bean plants, so we cannot determine the origin of the  
274 observed microbial consortia in the seeds and to what extent they overlap with the potting substrate.  
275 Previous work suggests that soil type can have a large influence on the seed endophytic bacteria in rice  
276 (Hardoim et al., 2012), and this is likely also true for other plant seeds. We observed a dominance of a  
277 specific taxon from genus *Bacillus* in common bean seeds in all three treatments. While *Bacillus* taxa  
278 were reported to be enriched in the green bean seedling (Barret et al., 2015), steam sterilization of the  
279 growth chamber soil may have killed most of the indigenous microbial taxa that were not spore-formers  
280 or otherwise resistant to heat (and, bacilli are known to be resistant to such treatments, as per  
281 (Nicholson et al., 2000)). Therefore, the microbial composition that were observed in these bean seeds  
282 may not be representative of or similar to those in bean seeds grown in the field, or even in different  
283 substrates. We urge caution in generalizing from the compositional changes, but rather to focus on the  
284 larger changes in beta-diversity and dispersion that were consistently observed across very different  
285 abiotic treatments and may be more characteristic of seed microbiome responses. Future work should  
286 focus efforts on using soil that is representative of the typical agricultural environment of common  
287 bean, and the existing microbial community in the soil should be sequenced prior to planting for  
288 comparison to the seed microbiome.

289           Another limitation of this study the absence of negative controls for DNA extraction controls.  
290   Seed endophytes contain a very low total biomass of microbial cells. Here, we pooled twenty seeds to  
291   use for one extraction to increase the microbial biomass yield for microbiome interrogation. However,  
292   we did not perform a buffer-only control, which would allow for assessment of contaminants from the  
293   DNA extraction process. While the surface-sterilization of the seeds prior to extraction and negative PCR  
294   controls provide confidence that the starting material was not compromised and that we did not  
295   unintentionally amplify contaminants from the PCR reagents, we cannot know if there were or  
296   extraction kit or buffer contaminants that contributed to the observed seed microbiome composition.

297           A final minor limitation is in the choice of bacterial marker gene. We performed amplicon  
298   sequencing of the 16S rRNA gene for the bacterial/archaeal community analysis in the seed. It is well  
299   known that the variability of rRNA copy numbers among bacterial species can lead to an inflation of  
300   species richness and obfuscate relative abundances of taxa (Větrovský & Baldrian, 2013). Moreover, the  
301   most resolved taxonomic level achieved from 16S rRNA amplicon gene sequences often is genus, rather  
302   than species or strain. Using a single-copy marker gene that has higher precision and sensitivity at the  
303   species level, like the *gyrB* gene, may be a valuable alternative (Barret et al., 2015). The *gyrB* gene has  
304   been successfully applied to other seed microbiome studies (Barret et al., 2015; Rezki et al., 2016; Rezki  
305   et al., 2017). It may be valuable to consider use of both marker genes to the same seed microbiome  
306   samples, so that taxonomic precision can be maximized and compared across seeds with *gyrB*, while  
307   also maintaining an ability to source-track and compare composition across the many plant-microbiome  
308   16S rRNA amplicon datasets that have been deposited publicly.

309           In summary, while this pilot study provides a key insight into the response of the seed  
310   microbiome structure to abiotic treatment in the host plant, there is much more work to be done. Next  
311   steps include exposing the plants to more severe drought and nutrient excess conditions, quantifying  
312   the physiological status of plants to determine their experience of stress, using representative field soil

313 for plants and assessing the field soil microbiome to deduce seed taxon origins, using negative controls  
314 for both DNA extractions to identify contaminants, and considering use of an alternative marker gene  
315 for improved precision in microbial taxonomy and taxon abundances.

316           Despite noted considerations and limitations, we posit that this pilot study revealed an  
317 important insight regarding how seed microbiomes may be altered after abiotic treatment of a plant.  
318 Next, we need to understand the implications of this change for both the host plant and the microbial  
319 community. An altered seed microbiome may have positive, negative, or entirely neutral outcomes for  
320 the next plant generation. Additional work is needed to understand these outcomes over consecutive  
321 plant generations to determine the effects on plant fitness and resilience. If positive or negative  
322 outcomes are detected, this work opens a new direction of research that could spur exciting  
323 applications in plant-microbiome management.

324

### 325 **Acknowledgements**

326 This work was supported by the Michigan State University Plant Resilience Institute and by the USDA  
327 National Institute of Food and Agriculture award USDA 2019-67019-29305. AFB acknowledges support  
328 from the Fulbright Foreign Student Program and Office for International Students and Scholars (OISS),  
329 Michigan State University; and AS acknowledges support from the USDA National Institute of Food and  
330 Agriculture and Michigan AgBioResearch (Hatch). We thank Matthieu Barret and the Shade Lab for  
331 helpful discussions.

332

333

334 **Tables**

335 Table 1. Comparison of plant biomass among treatments. Bolded rows are significantly different as  
 336 determined by Kruskal-Wallis test and post-hoc Dunn's test with Benjamini-Hochberg false discovery  
 337 rate (FDR) correction

| Parameter  | Kruskal-Wallis test |    |                | Post-hoc Dunn's test with Benjamini-Hochberg FDR correction |          |          |                |
|------------|---------------------|----|----------------|-------------------------------------------------------------|----------|----------|----------------|
|            | Chi-squared         | df | p-val          | Comparison                                                  | Z        | P. unadj | P. adj         |
| Shoot mass | 20.165              | 2  | <b>0.00004</b> | Control – Nutrient addition                                 | -2.29810 | 0.02156  | <b>0.03233</b> |
|            |                     |    |                | Control – Water withholding                                 | 2.19203  | 0.02838  | <b>0.02838</b> |
|            |                     |    |                | Nutrient addition – Water withholding                       | 4.49013  | 0.00001  | <b>0.00002</b> |
| Root mass  | 15.365              | 2  | <b>0.00046</b> | Control – Nutrient addition                                 | -3.42947 | 0.00060  | <b>0.00181</b> |
|            |                     |    |                | Control – Water withholding                                 | -0.07071 | 0.94363  | 0.94363        |
|            |                     |    |                | Nutrient addition – Water withholding                       | 3.35876  | 0.00078  | <b>0.00117</b> |
| Pod mass   | 18.305              | 2  | <b>0.00010</b> | Control – Nutrient addition                                 | -2.08597 | 0.03698  | <b>0.03698</b> |
|            |                     |    |                | Control – Water withholding                                 | 2.19203  | 0.02838  | <b>0.04257</b> |
|            |                     |    |                | Nutrient addition – Water withholding                       | 4.27800  | 0.00002  | <b>0.00006</b> |
| Pod number | 17.973              | 2  | <b>0.00013</b> | Control – Nutrient addition                                 | -2.53347 | 0.01129  | <b>0.01694</b> |
|            |                     |    |                | Control – Water withholding                                 | 1.67708  | 0.09353  | 0.09353        |
|            |                     |    |                | Nutrient addition – Water withholding                       | 4.21055  | 0.00003  | <b>0.00008</b> |

338

339

340 Table 2. Comparison of rhizosphere soil chemistry of the three treatments using one-way ANOVA or  
 341 Kruskal-Wallis test. Bolded rows are significantly different as determined by Kruskal-Wallis test and post-  
 342 hoc Dunn's test with Benjamini-Hochberg false discovery rate (FDR) correction.

| Kruskal-Wallis test          |             |    |                | Post-hoc Dunn's test with Benjamini-Hochberg FDR correction |          |          |                |
|------------------------------|-------------|----|----------------|-------------------------------------------------------------|----------|----------|----------------|
| Parameter                    | Chi-squared | df | p-value        | Comparison                                                  | Z        | P. unadj | P. adj         |
| pH                           | 14.634      | 2  | <b>0.00066</b> | Control – Nutrient addition                                 | 3.824263 | 0.00013  | <b>0.00039</b> |
|                              |             |    |                | Control – Water withholding                                 | 1.83057  | 0.06716  | 0.06716        |
|                              |             |    |                | Nutrient addition – Water withholding                       | -1.99369 | 0.04619  | 0.06928        |
| P                            | 15.613      | 2  | <b>0.00041</b> | Control – Nutrient addition                                 | -3.60033 | 0.00032  | <b>0.00095</b> |
|                              |             |    |                | Control – Water withholding                                 | -0.39018 | 0.69640  | 0.69640        |
|                              |             |    |                | Nutrient addition – Water withholding                       | 3.21014  | 0.00133  | <b>0.00199</b> |
| K                            | 19.172      | 2  | <b>0.00007</b> | Control – Nutrient addition                                 | -4.34149 | 0.00001  | <b>0.00004</b> |
|                              |             |    |                | Control – Water withholding                                 | -1.67822 | 0.09330  | 0.09330        |
|                              |             |    |                | Nutrient addition – Water withholding                       | 2.66327  | 0.00774  | <b>0.01161</b> |
| NO <sub>3</sub> <sup>-</sup> | 14.261      | 2  | <b>0.0008</b>  | Control – Nutrient addition                                 | -3.67776 | 0.00024  | <b>0.00071</b> |
|                              |             |    |                | Control – Water withholding                                 | -2.58150 | 0.00984  | <b>0.01476</b> |
|                              |             |    |                | Nutrient addition – Water withholding                       | 1.09625  | 0.27297  | 0.27297        |
| Mg                           | 4.8514      | 2  | 0.08842        |                                                             |          |          |                |
| OM                           | 0.53985     | 2  | 0.7634         |                                                             |          |          |                |
| One-way ANOVA test           |             |    |                |                                                             |          |          |                |
| Parameter                    | F-value     | df | p-value        |                                                             |          |          |                |
| Ca                           | 2.035       | 2  | 0.156          |                                                             |          |          |                |
| NH <sub>4</sub> <sup>+</sup> | 0.343       | 2  | 0.713          |                                                             |          |          |                |

343

344



345 **Figure legends**

346 **Fig 1.** Plant aboveground (shoot) and belowground (root) biomass for control, water withholding, and  
347 nutrient addition treatments of common bean. Plant biomasses were calculated on eight plant  
348 replicates for each treatment. For each box plot, circles represent a single plant measurement within a  
349 treatment. The central horizontal lines represent the mean, the outer horizontal lines of the box  
350 represent the 25th and 75th percentiles. Boxes labelled with different letters were significantly different  
351 by a Kruskal-Wallis and post-hoc Dunn's test with a Benjamini-Hochberg false discovery rate correction.

352  
353 **Fig 2.** Plant rhizosphere soil chemistry for control, water with-holding, and nutrient addition treatments  
354 of common bean. For each box plot, circles represent one rhizosphere measurement within a treatment.  
355 The central horizontal lines represent the mean of measurement, the outer horizontal lines of the box  
356 represent the 25th and 75th percentiles. Boxes labelled with different letters are identified as  
357 significantly different by a Kruskal-Wallis and post-hoc Dunn's test with a Benjamini-Hochberg false  
358 discovery rate correction.

359  
360 **Fig 3.** Mean relative abundances of genera of bacterial/archaeal (A) and fungal (B) detected in the seed  
361 across control, water with-holding and nutrient addition treatments. Each bar represents the endophyte  
362 microbiome from DNA extracted from 20 seeds collected from one plant replicate within a treatment.  
363 Bacterial/archaeal and fungal genera with mean relative abundances of less than 1 and 10 %,  
364 respectively, were grouped into the 'Other' classification, which includes many lineages (not  
365 monophyletic).

366

367 **Fig. 4** Principal coordinate analysis (PCoA) plot of the bacterial/archaeal (A) and fungal community (B) in  
368 the common bean seed based on the Jaccard index. Symbol colors and shapes represent different  
369 abiotic treatments.  
370

371 **References**

- 372 Anderson, M. J., & Walsh, D. C. I. (2013). PERMANOVA, ANOSIM, and the Mantel test in the face of  
373 heterogeneous dispersions: What null hypothesis are you testing? *Ecological Monographs*,  
374 *83*(4), 557-574. doi:10.1890/12-2010.1
- 375 Barret, M., Briand, M., Bonneau, S., Prévieux, A., Valière, S., Bouchez, O., . . . Jacques, M.-A. (2015).  
376 Emergence Shapes the Structure of the Seed Microbiota. *Applied and Environmental*  
377 *Microbiology*, *81*(4), 1257-1266. doi:10.1128/aem.03722-14
- 378 Bergna, A., Cernava, T., Rändler, M., Grosch, R., Zachow, C., & Berg, G. (2018). Tomato Seeds Preferably  
379 Transmit Plant Beneficial Endophytes. *Phytobiomes Journal*, *2*(4), 183-193.  
380 doi:10.1094/pbiomes-06-18-0029-r
- 381 Caporaso, J. G., Bittinger, K., Bushman, F. D., DeSantis, T. Z., Andersen, G. L., & Knight, R. (2010a).  
382 PyNAST: a flexible tool for aligning sequences to a template alignment. *Bioinformatics*, *26*(2),  
383 266-267. doi:10.1093/bioinformatics/btp636
- 384 Caporaso, J. G., Kuczynski, J., Stombaugh, J., Bittinger, K., Bushman, F. D., Costello, E. K., . . . Knight, R.  
385 (2010b). QIIME allows analysis of high-throughput community sequencing data. *Nature*  
386 *Methods*, *7*(5), 335-336. doi:10.1038/nmeth.f.303
- 387 Caporaso, J. G., Lauber, C. L., Walters, W. A., Berg-Lyons, D., Lozupone, C. A., Turnbaugh, P. J., . . . Knight,  
388 R. (2011). Global patterns of 16S rRNA diversity at a depth of millions of sequences per sample.  
389 *Proceedings of the National Academy of Sciences*, *108*(Supplement 1), 4516-4522.  
390 doi:10.1073/pnas.1000080107
- 391 Cole, J. R., Wang, Q., Fish, J. A., Chai, B., McGarrell, D. M., Sun, Y., . . . Tiedje, J. M. (2014). Ribosomal  
392 Database Project: data and tools for high throughput rRNA analysis. *Nucleic Acids Res*,  
393 *42*(Database issue), D633-642. doi:10.1093/nar/gkt1244
- 394 Compant, S., Samad, A., Faist, H., & Sessitsch, A. (2019). A review on the plant microbiome: ecology,  
395 functions and emerging trends in microbial application. *Journal of advanced research*, *19*, 29-97.  
396 doi:https://doi.org/10.1016/j.jare.2019.03.004
- 397 Edgar, R. C. (2010). Search and clustering orders of magnitude faster than BLAST. *Bioinformatics*, *26*(19),  
398 2460-2461. doi:10.1093/bioinformatics/btq461
- 399 Edgar, R. C. (2013). UPARSE: highly accurate OTU sequences from microbial amplicon reads. *Nature*  
400 *Methods*, *10*(10), 996-998. doi:10.1038/nmeth.2604
- 401 Edgar, R. C. (2016). SINTAX: a simple non-Bayesian taxonomy classifier for 16S and ITS sequences.  
402 *bioRxiv*, 074161. doi:10.1101/074161
- 403 Edgar, R. C., & Flyvbjerg, H. (2015). Error filtering, pair assembly and error correction for next-generation  
404 sequencing reads. *Bioinformatics*, *31*(21), 3476-3482. doi:10.1093/bioinformatics/btv401
- 405 Edwards, J., Johnson, C., Santos-Medellín, C., Lurie, E., Podishetty, N. K., Bhatnagar, S., . . . Sundaresan,  
406 V. (2015). Structure, variation, and assembly of the root-associated microbiomes of rice.  
407 *Proceedings of the National Academy of Sciences*, *112*(8), E911-E920.  
408 doi:10.1073/pnas.1414592112
- 409 Gargallo-Garriga, A., Sardans, J., Pérez-Trujillo, M., Guenther, A., Llusà, J., Rico, L., . . . Parella, T. (2016).  
410 Shifts in plant foliar and floral metabolomes in response to the suppression of the associated  
411 microbiota. *BMC plant biology*, *16*(1), 78. doi:https://doi.org/10.1186/s12870-016-0767-7
- 412 Gdanetz, K., Benucci, G. M. N., Vande Pol, N., & Bonito, G. (2017). CONSTAX: a tool for improved  
413 taxonomic resolution of environmental fungal ITS sequences. *BMC Bioinformatics*, *18*(1), 538.  
414 doi:10.1186/s12859-017-1952-x
- 415 Gihring, T. M., Green, S. J., & Schadt, C. W. (2012). Massively parallel rRNA gene sequencing exacerbates  
416 the potential for biased community diversity comparisons due to variable library sizes.  
417 *Environmental Microbiology*, *14*(2), 285-290. doi:10.1111/j.1462-2920.2011.02550.x

- 418 Goggin, D. E., Emery, R. J. N., Kurepin, L. V., & Powles, S. B. (2015). A potential role for endogenous  
419 microflora in dormancy release, cytokinin metabolism and the response to fluridone in *Lolium*  
420 *rigidum* seeds. *Ann Bot*, *115*(2), 293-301. doi:10.1093/aob/mcu231
- 421 Hacquard, S., Spaepen, S., Garrido-Oter, R., & Schulze-Lefert, P. (2017). Interplay Between Innate  
422 Immunity and the Plant Microbiota. *Annu Rev Phytopathol*, *55*, 565-589. doi:10.1146/annurev-  
423 phyto-080516-035623
- 424 Hardoim, P. R., Hardoim, C. C. P., van Overbeek, L. S., & van Elsas, J. D. (2012). Dynamics of seed-borne  
425 rice endophytes on early plant growth stages. *PLoS one*, *7*(2), e30438-e30438.  
426 doi:10.1371/journal.pone.0030438
- 427 Herrera Paredes, S., Gao, T., Law, T. F., Finkel, O. M., Mucyn, T., Teixeira, P. J. P. L., . . . Castrillo, G.  
428 (2018). Design of synthetic bacterial communities for predictable plant phenotypes. *PLoS*  
429 *Biology*, *16*(2), e2003962. doi:10.1371/journal.pbio.2003962
- 430 Jones, P., Garcia, B. J., Furches, A., Tuskan, G. A., & Jacobson, D. (2019). Plant Host-Associated  
431 Mechanisms for Microbial Selection. *Frontiers in Plant Science*, *10*(862).  
432 doi:10.3389/fpls.2019.00862
- 433 Kõljalg, U., Nilsson, R. H., Abarenkov, K., Tedersoo, L., Taylor, A. F. S., Bahram, M., . . . Larsson, K.-H.  
434 (2013). Towards a unified paradigm for sequence-based identification of fungi. *Molecular*  
435 *Ecology*, *22*(21), 5271-5277. doi:10.1111/mec.12481
- 436 Lamichhane, J. R., Debaeke, P., Steinberg, C., You, M. P., Barbetti, M. J., & Aubertot, J.-N. (2018). Abiotic  
437 and biotic factors affecting crop seed germination and seedling emergence: a conceptual  
438 framework. *Plant and Soil*, *432*(1), 1-28. doi:10.1007/s11104-018-3780-9
- 439 Lau, J. A., & Lennon, J. T. (2012). Rapid responses of soil microorganisms improve plant fitness in novel  
440 environments. *Proceedings of the National Academy of Sciences*, *109*(35), 14058-14062.  
441 doi:10.1073/pnas.1202319109
- 442 Lee, S.-H., Sorensen, J. W., Grady, K. L., Tobin, T. C., & Shade, A. (2017). Divergent extremes but  
443 convergent recovery of bacterial and archaeal soil communities to an ongoing subterranean coal  
444 mine fire. *The ISME Journal*, *11*(6), 1447-1459. doi:10.1038/ismej.2017.1
- 445 Martin, M. (2011). Cutadapt removes adapter sequences from high-throughput sequencing reads. *2011*,  
446 *17*(1), 3. doi:10.14806/ej.17.1.200
- 447 Maude, R. (1996). *Seedborne diseases and their control: principles and practice*: CAB international.
- 448 McMurdie, P. J., & Holmes, S. (2013). phyloseq: An R Package for Reproducible Interactive Analysis and  
449 Graphics of Microbiome Census Data. *PLOS ONE*, *8*(4), e61217.  
450 doi:10.1371/journal.pone.0061217
- 451 Mendes, R., Kruijt, M., de Bruijn, I., Dekkers, E., van der Voort, M., Schneider, J. H., . . . Raaijmakers, J. M.  
452 (2011). Deciphering the rhizosphere microbiome for disease-suppressive bacteria. *Science*,  
453 *332*(6033), 1097-1100. doi:10.1126/science.1203980
- 454 Müller, S. H., & Pereira, P. A. A. (1995). Nitrogen fixation of common bean (*Phaseolus vulgaris* L.) as  
455 affected by mineral nitrogen supply at different growth stages. *Plant and Soil*, *177*(1), 55-61.  
456 doi:10.1007/BF00010337
- 457 Naylor, D., & Coleman-Derr, D. (2018). Drought Stress and Root-Associated Bacterial Communities.  
458 *Frontiers in Plant Science*, *8*(2223). doi:10.3389/fpls.2017.02223
- 459 Nicholson, W. L., Munakata, N., Horneck, G., Melosh, H. J., & Setlow, P. (2000). Resistance of *Bacillus*  
460 endospores to extreme terrestrial and extraterrestrial environments. *Microbiol Mol Biol Rev*,  
461 *64*(3), 548-572. doi:10.1128/mmlr.64.3.548-572.2000
- 462 Oksanen, J., Blanchet, F. G., Friendly, M., Kindt, R., Legendre, P., McGlinn, D., . . . Wagner, H. (2019).  
463 vegan: Community Ecology Package. R package version 2.5-6. Retrieved from [https://CRAN.R-](https://CRAN.R-project.org/package=vegan)  
464 [project.org/package=vegan](https://CRAN.R-project.org/package=vegan)

- 465 Panke-Buisse, K., Poole, A. C., Goodrich, J. K., Ley, R. E., & Kao-Kniffin, J. (2015). Selection on soil  
466 microbiomes reveals reproducible impacts on plant function. *The ISME Journal*, *9*(4), 980-989.  
467 doi:10.1038/ismej.2014.196
- 468 Quast, C., Pruesse, E., Yilmaz, P., Gerken, J., Schweer, T., Yarza, P., . . . Glöckner, F. O. (2013). The SILVA  
469 ribosomal RNA gene database project: improved data processing and web-based tools. *Nucleic  
470 Acids Res*, *41*(Database issue), D590-596. doi:10.1093/nar/gks1219
- 471 Rezki, S., Campion, C., Iacomi-Vasilescu, B., Preveaux, A., Toualbia, Y., Bonneau, S., . . . Barret, M. (2016).  
472 Differences in stability of seed-associated microbial assemblages in response to invasion by  
473 phytopathogenic microorganisms. *PeerJ*, *4*, e1923-e1923. doi:10.7717/peerj.1923
- 474 Rezki, S., Campion, C., Simoneau, P., Jacques, M.-A., Shade, A., & Barret, M. (2017). Assembly of seed-  
475 associated microbial communities within and across successive plant generations. *Plant and Soil*,  
476 *422*, 1-13. doi:10.1007/s11104-017-3451-2
- 477 Ritpitakphong, U., Falquet, L., Vimoltust, A., Berger, A., Métraux, J.-P., & L'Haridon, F. (2016). The  
478 microbiome of the leaf surface of *Arabidopsis* protects against a fungal pathogen. *New  
479 Phytologist*, *210*(3), 1033-1043. doi:10.1111/nph.13808
- 480 Rodríguez, C. E., Antonielli, L., Mitter, B., Trognitz, F., & Sessitsch, A. (2020). Heritability and Functional  
481 Importance of the *Setaria viridis* Bacterial Seed Microbiome. *Phytobiomes Journal*, *4*(1), 40-52.  
482 doi:10.1094/pbiomes-04-19-0023-r
- 483 Sasse, J., Martinoia, E., & Northen, T. (2018). Feed Your Friends: Do Plant Exudates Shape the Root  
484 Microbiome? *Trends Plant Sci*, *23*(1), 25-41. doi:10.1016/j.tplants.2017.09.003
- 485 Shade, A., Jacques, M. A., & Barret, M. (2017). Ecological patterns of seed microbiome diversity,  
486 transmission, and assembly. *Curr Opin Microbiol*, *37*, 15-22. doi:10.1016/j.mib.2017.03.010
- 487 Vacher, C., Hampe, A., Porté, A. J., Sauer, U., Compant, S., & Morris, C. E. (2016). The Phyllosphere:  
488 Microbial Jungle at the Plant–Climate Interface. *Annual Review of Ecology, Evolution, and  
489 Systematics*, *47*(1), 1-24. doi:10.1146/annurev-ecolsys-121415-032238
- 490 Větrovský, T., & Baldrian, P. (2013). The Variability of the 16S rRNA Gene in Bacterial Genomes and Its  
491 Consequences for Bacterial Community Analyses. *PLOS ONE*, *8*(2), e57923.  
492 doi:10.1371/journal.pone.0057923
- 493 Walters, W., Hyde, E. R., Berg-Lyons, D., Ackermann, G., Humphrey, G., Parada, A., . . . Knight, R. (2015).  
494 Improved Bacterial 16S rRNA Gene (V4 and V4-5) and Fungal Internal Transcribed Spacer Marker  
495 Gene Primers for Microbial Community Surveys. *mSystems*, *1*(1), e00009-00015.  
496 doi:10.1128/mSystems.00009-15
- 497 Wang, Q., Garrity, G. M., Tiedje, J. M., & Cole, J. R. (2007). Naive Bayesian classifier for rapid assignment  
498 of rRNA sequences into the new bacterial taxonomy. *Applied and environmental microbiology*,  
499 *73*(16), 5261-5267. doi:10.1128/AEM.00062-07
- 500 Weiss, S., Xu, Z. Z., Peddada, S., Amir, A., Bittinger, K., Gonzalez, A., . . . Knight, R. (2017). Normalization  
501 and microbial differential abundance strategies depend upon data characteristics. *Microbiome*,  
502 *5*(1), 27. doi:10.1186/s40168-017-0237-y
- 503 Wilker, J., Navabi, A., Rajcan, I., Marsolais, F., Hill, B., Torkamaneh, D., & Pauls, K. P. (2019). Agronomic  
504 Performance and Nitrogen Fixation of Heirloom and Conventional Dry Bean Varieties Under  
505 Low-Nitrogen Field Conditions. *Frontiers in Plant Science*, *10*(952). doi:10.3389/fpls.2019.00952
- 506 Xu, L., Naylor, D., Dong, Z., Simmons, T., Pierroz, G., Hixson, K. K., . . . Coleman-Derr, D. (2018). Drought  
507 delays development of the sorghum root microbiome and enriches for monoderm bacteria. *Proc  
508 Natl Acad Sci U S A*, *115*(18), E4284-e4293. doi:10.1073/pnas.1717308115
- 509 Zaneveld, J. R., McMinds, R., & Vega Thurber, R. (2017). Stress and stability: applying the Anna Karenina  
510 principle to animal microbiomes. *Nat Microbiol*, *2*, 17121. doi:10.1038/nmicrobiol.2017.121  
511

512 **Figure 1**  
513

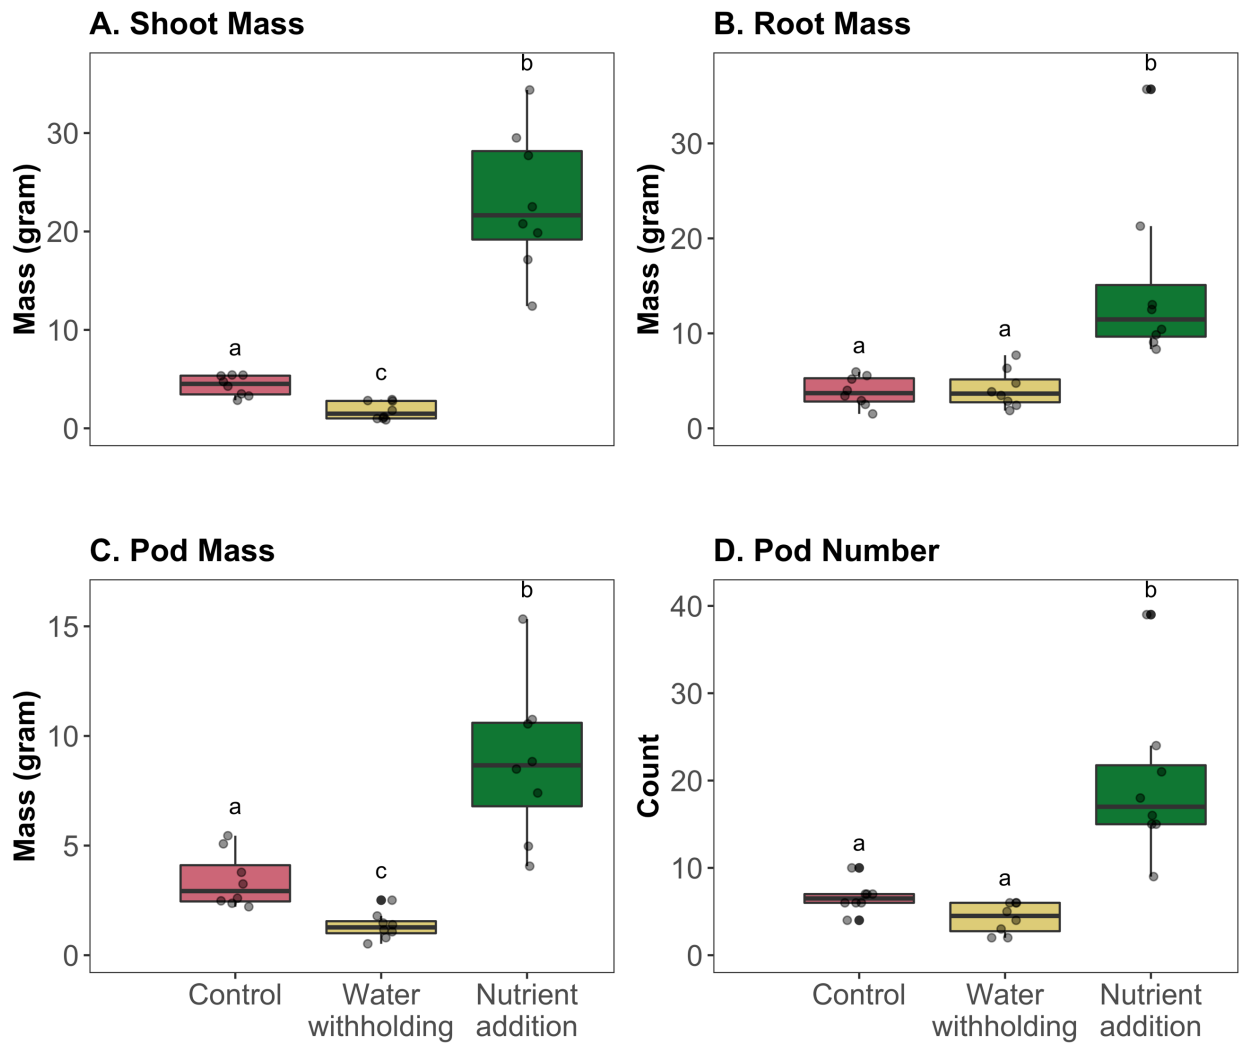

514  
515

516 **Figure 2**

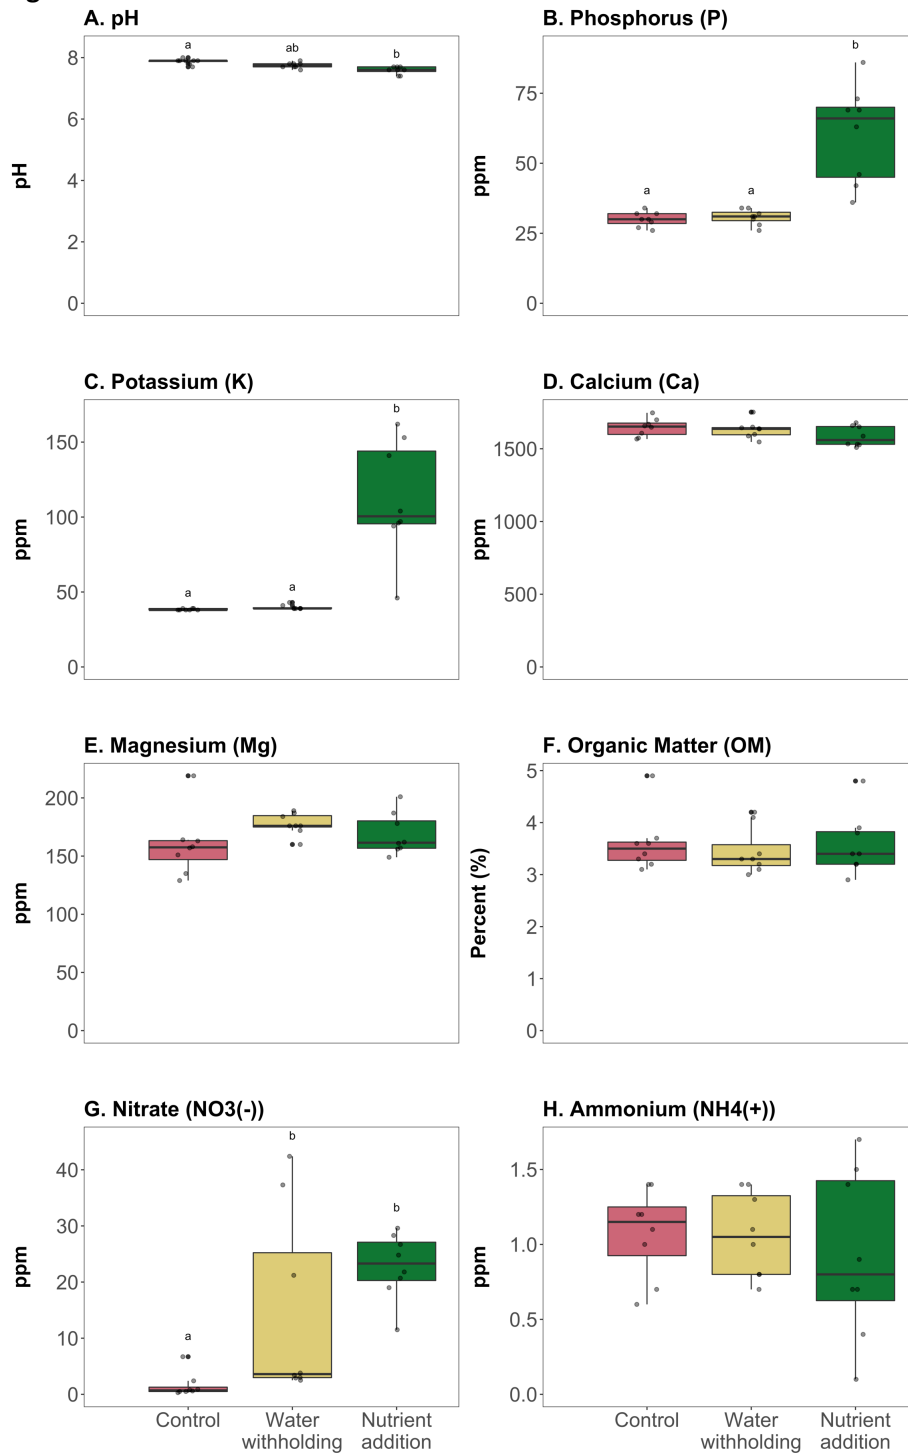

517  
518

519 **Figure 3**  
520

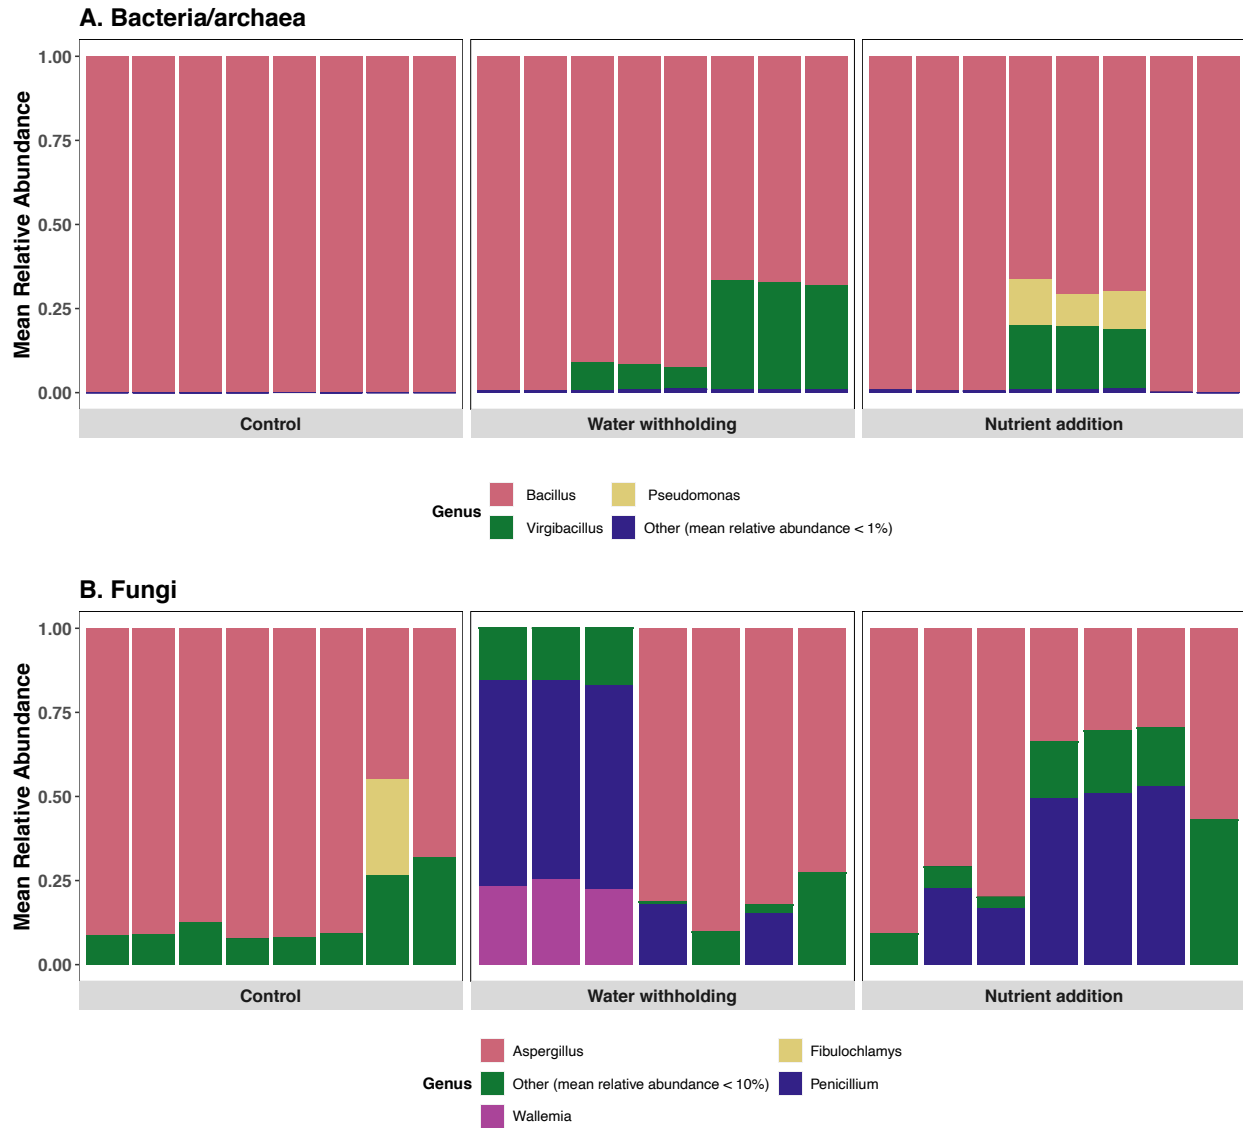

521  
522  
523



524 **Figure 4**

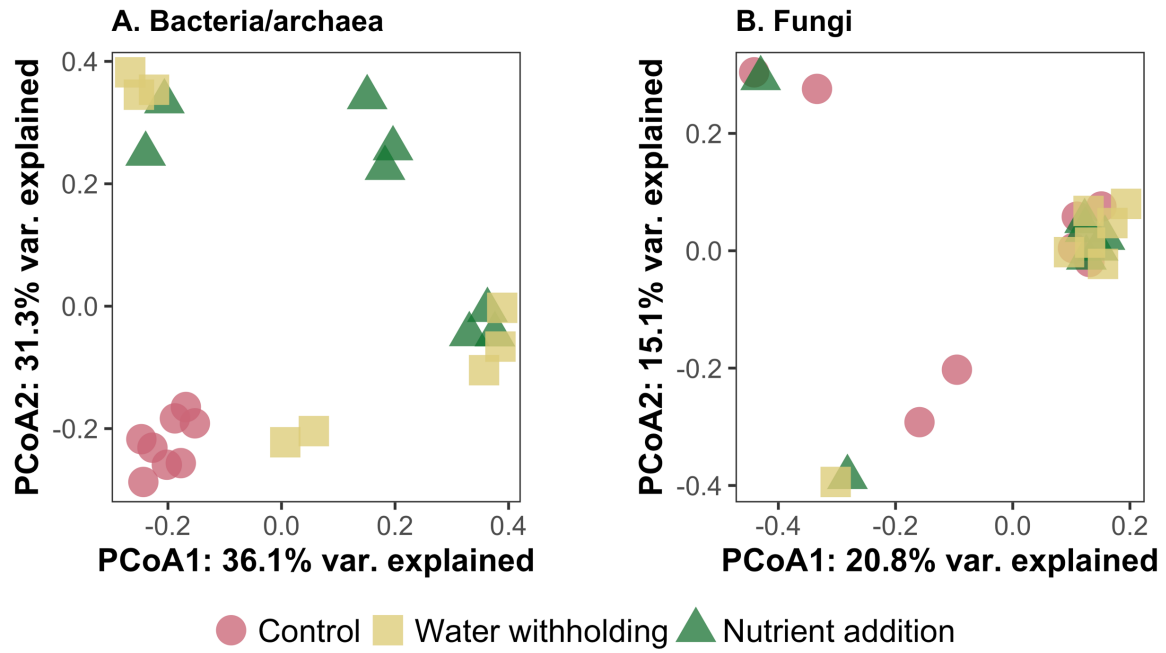

525  
526  
527
